# Supplementary material for: Axial Movements and Length Changes of the Human Lower Esophageal Sphincter During Respiration and Distension-induced Secondary Peristalsis Using Functional Luminal Imaging Probe
Source: PubMed Central journal article supplement — J Neurogastroenterol Motil. 2018 Apr 1;24(2):255–67. doi: 10.5056/jnm17084 (PMC5885725; doi:10.5056/jnm17084), 2018-04-01
Supplement: jnm-24-255_appendix.pdf [file jnm-24-255_appendix.pdf]

## Appendix. Lower Esophageal Sphincter Narrow Zone Motion Parameters

During each distension volume, the lower esophageal sphincter (LES) narrow zone motion parameters were defined as:

### (1) LES narrow zone length, $L(t)$ :

$$L(t) = B_{lower}(t) - B_{upper}(t) \quad [1]$$

where  $B_{upper}(t)$ ,  $B_{lower}(t)$  are upper and lower edges of the narrow zone during the distension, the peak-to-peak amplitude of the  $L(t)$  (maximum value - minimum value in a cyclic fluctuation) was calculated as the shortening of the LES narrow zone in a given contraction cycle.

### (2) The LES narrow zone upper and lower boundary baseline, $\overline{B_{upper}(t)}$ and $\overline{B_{lower}(t)}$ :

$\overline{B_{upper}(t)}$  is the averaged  $B_{upper}(t)$  during each distension volume.  
 $\overline{B_{lower}(t)}$  is the averaged  $B_{lower}(t)$  during each distension volume.

### (3) The proximal, middle, and distal locations of the narrow zone:

$$\begin{aligned} \text{Proximal narrow zone: } L_{proximal}(t) &= \overline{B_{upper}(t)} + 0.25 * L(t) \\ \text{Middle narrow zone: } L_{middle}(t) &= \overline{B_{upper}(t)} + 0.5 * L(t) \\ \text{Distal narrow zone: } L_{distal}(t) &= \overline{B_{upper}(t)} + 0.75 * L(t) \end{aligned} \quad [2]$$

### (4) The axial movement of the LES narrow zone, $L_{movement}(t)$ :

$$L_{movement}(t) = \overline{B_{lower}(t)} - B_{lower}(t) \quad [3]$$

The peak-to-peak amplitude of the  $L_{movement}(t)$  (maximum value - minimum value in a cyclic fluctuation) was calculated as the upward movement of the LES narrow zone in a contraction cycle.

### (5) The bag pressure change during the distension, $P(t)$ :

The peak-to-peak amplitude of the  $P(t)$  (maximum value - minimum value in a cyclic fluctuation) was calculated as the contraction pressure change of the LES narrow zone in one contraction cycle.

### (6) The diameter change

The diameter change during the distension in the distal, middle and proximal parts of the LES narrow zone, were denoted as:  $D_{distal}(t)$  (the diameter at  $L_{distal}(t)$ ),  $D_{middle}(t)$  (the diameter at  $L_{middle}(t)$ ), and  $D_{proximal}(t)$  (the diameter at  $L_{proximal}(t)$ ). The peak-to-peak amplitude of the  $D_{middle}(t)$  (maximum value - minimum value in a cyclic fluctuation) was calculated as the contraction diameter change of the LES narrow zone in one contraction cycle.

### (7) Peristaltic velocity $v$

For distension-evoked secondary peristaltic contractions, the peristaltic velocity  $v$  was calculated as:  $v = (L_{distal} - L_{proximal}) / (t_{distal} - t_{proximal})$ , where  $t_{distal}$ ,  $t_{proximal}$  were time at the minimum  $D_{distal}$  and  $D_{proximal}$  during a contraction cycle, and  $L_{distal}$  and  $L_{proximal}$  were the 25% and 75% LES narrow zone length at  $t_{distal}$  and  $t_{proximal}$ .
